# Supplementary material
Source: PubMed Central journal article supplement (PMC6785793)
Supplement: jnm222174SupplementalData.pdf [file jnm222174SupplementalData.pdf]

# SUPPLEMENTAL TABLE 1

## Patients Characteristics of Benign Nodules

| <b>Nodule</b> | <b>Age at diagnosis</b> | <b>Localization</b> | <b>Dignity</b> | <b>Scintigraphy</b> | <b>FNA</b> | <b>Histopathology</b> |
|---------------|-------------------------|---------------------|----------------|---------------------|------------|-----------------------|
| #1            | 82                      | Left lobe           | Benign         | Hyperfunctional     | -          | -                     |
| #2            | 82                      | Right lobe          | Benign         | Hyperfunctional     | -          | -                     |
| #3            | 53                      | Right lobe          | Benign         | Hyperfunctional     | -          | -                     |
| #4            | 52                      | Left lobe           | Benign         | Hyperfunctional     | -          | -                     |
| #5            | 52                      | Right lobe          | Benign         | Hyperfunctional     | -          | -                     |
| #6            | 54                      | Left lobe           | Benign         | Hypofunctional      | Thy III    | No malignancy         |
| #7            | 60                      | Left lobe           | Benign         | Hypofunctional      | Thy II     | -                     |
| #8            | 60                      | Right lobe          | Benign         | Hypofunctional      | Thy II     | -                     |
| #9            | 51                      | Right lobe          | Benign         | Hypofunctional      | Thy III    | No malignancy         |
| #10           | 42                      | Left lobe           | Benign         | Hypofunctional      | Thy II     | No malignancy         |
| #11           | 57                      | Left lobe           | Benign         | Hypofunctional      | Thy II     | -                     |
| #12           | 57                      | Right lobe          | Benign         | Hypofunctional      | Thy II     | -                     |
| #13           | 68                      | Right lobe          | Benign         | Hypofunctional      | Thy I      | No malignancy         |
